# Supplementary material
Source: PubMed Central journal article supplement (PMC1976193)
Supplement: pnas_0703219104_2.pdf [file pnas_0703219104_2.pdf]

**A****Protein Carbonyl content (mitochondria)****B****Oxyblot (total brain lysate)**

18 months

24 months

**C****Oxyblot (mitochondria)**

18 months

24 months
