# Supplementary material
Source: PubMed Central journal article supplement (PMC1976193)

A

## IP- Whole brain lysis

SALINE

MPTP

WT

KO

WT

WT

KO

Cys106

DJ-1

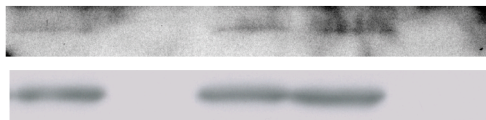

## IP-Whole brain Lysis

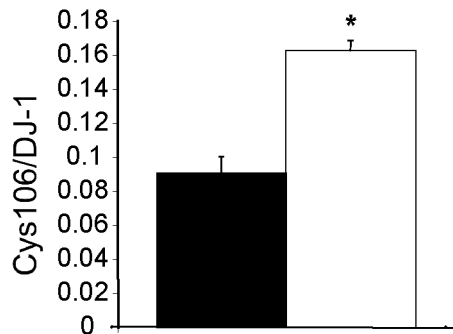

B

## Mitochondrial fraction

SALINE

MPTP

KO

KO

WT

WT

KO

KO

WT

WT

Cys106

DJ-1

VDAC

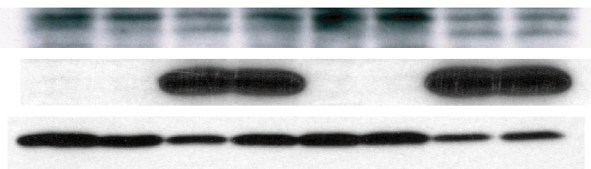

## Mitochondria

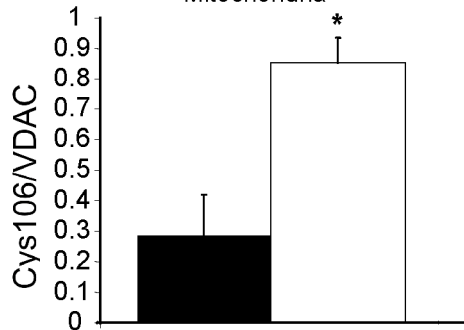

Supplement: pnas_0703219104_5.pdf [file pnas_0703219104_5.pdf]
